# Supplementary material
Source: Royal Society of Chemistry journal article supplement (doi:10.1039/d5ee07690k)
Supplement: d5ee07690k1.pdf [file d5ee07690k1.pdf]

## **Unraveling Oxygen Vacancy-Driven Catalytic Hydrogen Evolution Activity and Stability over Atomic-Layer-Deposited Platinum Cluster Catalysts**

Xinshuo Zhao,<sup>a,#</sup> Xiangbin Kong,<sup>b,#</sup> Ruokun Zhang,<sup>a</sup> Hao Xu,<sup>a</sup> Jiawei Yao,<sup>a</sup>  
Yutong Feng,<sup>a</sup> Yurong He,<sup>b,\*</sup> Yong Qin,<sup>c,\*</sup> Jiankang Zhang<sup>a,\*</sup>

<sup>a</sup> Interdisciplinary Research Center of Biology & Catalysis, School of Life Science and Technology, Northwestern Polytechnical University, Xi'an 710072, P. R. China

<sup>b</sup> State Key Laboratory of High-efficiency Coal Utilization and Green Chemical Engineering, College of Chemistry and Chemical Engineering, Ningxia University, Yinchuan 750000, P. R. China.

<sup>c</sup> State Key Laboratory of Advanced Optical Polymer and Manufacturing Technology, College of Materials Science and Engineering, Qingdao University of Science and Technology, Qingdao 266042, P. R. China

# These authors contributed equally to this work.

\* Corresponding authors. E-mail addresses: [hyr@nxu.edu.cn](mailto:hyr@nxu.edu.cn); [qinyong@qust.edu.cn](mailto:qinyong@qust.edu.cn); [zhangjiankang@nwpu.edu.cn](mailto:zhangjiankang@nwpu.edu.cn)

## Experimental section

### Materials

Ammonia borane ( $\text{NH}_3 \cdot \text{BH}_3$ ) was from Shanghai Macklin Biochemical Co., Ltd. Sodium acetate trihydrate ( $\text{CH}_3\text{COONa} \cdot 3\text{H}_2\text{O}$ ) and Ammonium molybdate tetrahydrate ( $(\text{NH}_4)_6\text{Mo}_7\text{O}_{24} \cdot 4\text{H}_2\text{O}$ ) were purchased from Shanghai Aladdin Chemistry Co., Ltd. Hydrogen peroxide ( $\text{H}_2\text{O}_2$ ), nitric acid ( $\text{HNO}_3$ ) and acetic acid ( $\text{CH}_3\text{COOH}$ ) were purchased from Sinopharm Chemical Reagent Co., Ltd. 3,3',5,5'-tetramethylbenzidine (TMB) and 1,2-diaminobenzene (OPD) were obtained from Energy Chemical Co., Ltd.

### Catalyst characterizations

Transmission electron microscopy (TEM), high-angle annular dark-field scanning TEM (HAADF-STEM) and energy-dispersive X-ray spectroscopy (EDS) mapping images were acquired from a transmission electron microscope operated at 300 kV (Themis FEI). The SEM images were obtained by a scanning electron microscope (ZEISS Sigma 500, USA). The Pt content was determined by inductively coupled plasma optical emission spectrometer (ICP-OES). The X-ray absorption fine structure (XAFS) measurements were carried out at the BL14W1 station in Shanghai Synchrotron Radiation Facility. The X-ray diffraction (XRD) patterns were obtained by using  $\text{Cu K}\alpha$  radiation. X-ray photoelectron spectroscopy (XPS) measurements were conducted on an ESCALab-250 spectrometer with an  $\text{Al K}\alpha$  source (1486.6 eV). Diffuse reflectance infrared Fourier transform spectroscopy of CO chemisorption (CO-DRIFTS) and attenuated total reflection Fourier transform infrared (ATR-FTIR) spectra were recorded on a Bruker Vector 22 spectrometer. The determination of quantitative oxygen vacancy was performed on an electron Paramagnetic resonance (EPR) spectrometer under 77 K (Bruker A300-10/12), and the production of  $\cdot\text{OH}$  and  $\cdot\text{O}_2^-$  was determined on a Bruker EPR A300 spectrometer with 5,5-dimethyl-1-pyrroline N-oxide (DMPO) as the spin trap.

### Catalyst synthesis

**MoO<sub>3</sub> nanorods:** Molybdenum trioxide was prepared by hydrothermal method.

Specifically, 15 mL of nitric acid ( $\text{HNO}_3$ ) and 75 mL of water ( $\text{H}_2\text{O}$ ) are fully mixed. Subsequently, 3.6 g ammonium molybdate tetrahydrate ( $(\text{NH}_4)_6\text{Mo}_7\text{O}_{24}\cdot 4\text{H}_2\text{O}$ ) was added to the above mixed solvent, and then it was ultrasonically mixed for 30 min and transferred to a polytetrafluoroethylene-lined autoclave (250 mL), heated in an oven at 200 °C for 8 h. After the reaction, the product was centrifuged, thoroughly washed with water and ethanol, and vacuum dried at 60 °C overnight. Finally, the white product collected is  $\text{MoO}_3$  nanorods.

**Pt<sub>n</sub>/MoO<sub>3</sub>:** Pt<sub>n</sub>/MoO<sub>3</sub> was synthesized by ALD process in a self-made closed chamber ALD reactor. Specifically, the synthesized MoO<sub>3</sub> was uniformly coated on a quartz glass sheet and dried in air at room temperature. Pt ALD is carried out by sequentially exposing MoO<sub>3</sub> to MeCpPtMe<sub>3</sub> and ozone (O<sub>3</sub>), where MeCpPtMe<sub>3</sub> acts as a platinum precursor and O<sub>3</sub> acts as an oxidant. The deposition temperature was set to 250 °C, and MeCpPtMe<sub>3</sub> was kept at 60 °C. Ultrapure nitrogen (99.999%) is used as carrier gas and purge gas. The loading of platinum was controlled by adjusting the number of Pt ALD cycles.

**Pt<sub>n</sub>/MoO<sub>3-x</sub>-yR:** Pt<sub>n</sub>/MoO<sub>3-x</sub>-yR was obtained by hydrogen activation. First, a certain amount of Pt<sub>n</sub>/MoO<sub>3</sub> was placed in a porcelain boat, and then transferred to a tube furnace. The activated Pt<sub>n</sub>/MoO<sub>3-x</sub>-yR (y represents hydrotreatment temperature) catalysts were obtained by hydrogen treatment (10% H<sub>2</sub>/Ar, 2 h) at 50, 150, 250 and 350 °C, respectively.

### **Catalyst evaluation**

**Hydrolytic dehydrogenation of AB:** A certain amount of catalysts and deionized water (usually 10 mL) were added to a round-bottom flask, and then AB was added under magnetic stirring to react at 25 °C. A U-shaped burette filled with water is used to systematically measure the volume of hydrogen generated by monitoring the change of water level. For the stability experiment, the same amount of AB is added to the reactor after the residual H<sub>2</sub> in the reaction system is exhausted. For the isotope effect experiment, the deionized water in the above reaction was replaced with an equal amount of D<sub>2</sub>O, and other reaction conditions remained unchanged.

**Catalytic oxidation of H<sub>2</sub>O<sub>2</sub>:** The production of free radicals from H<sub>2</sub>O<sub>2</sub> catalyzed by the catalyst was determined by two color reactions (TMB and OPD). TMB color reaction: In a typical experiment, a certain amount of catalyst was added to the buffer solution of HAc-NaAc (0.1M, pH = 5.0) and mixed uniformly by ultrasound. Then H<sub>2</sub>O<sub>2</sub> was added to make the final concentration of 1 mM (2 mL reaction system). Finally, TMB was added to the final concentration of 10 mM under stirring conditions. Finally, the resulting mixture was incubated at 37 °C and the absorbance at 652 nm was measured over time. For the determination of the kinetic curve of H<sub>2</sub>O<sub>2</sub>, the absorbance at 652 nm was compared by changing the concentration of H<sub>2</sub>O<sub>2</sub> and keeping other conditions unchanged. The performance of the catalyst in catalyzing the H<sub>2</sub>O<sub>2</sub> reaction was also evaluated using OPD as a substrate. The experimental process is similar to H<sub>2</sub>O<sub>2</sub>-TMB system except that the curve of the ultraviolet peak of ox-OPD at 450 nm with time was monitored by ultraviolet spectrophotometer.

**Determination of free radicals:** To test the free radicals generated by the catalyst catalyzing hydrogen peroxide, MB (5 µg/mL), H<sub>2</sub>O<sub>2</sub> (40 mM) and Pt<sub>n</sub>/MoO<sub>3-x</sub>-150R (200 µg/mL) were dispersed in a pH = 5.0 HAc-NaAc buffer solution (2 mL). Nanodrop was used to record the absorbance at 665 nm at different time points. In addition, the DMPO capture agent was used to detect the free radicals produced by the catalyst catalyzing hydrogen peroxide, and the free radical signal in the reaction process was detected by EPR.

## Methods

The DFT calculations were carried out using the Vienna Ab initio Simulation Package (VASP).<sup>1,2</sup> The electron-ion interactions were described using the projector-augmented wave (PAW).<sup>3,4</sup> The Perdew-Burke-Ernzerhof (PBE) functional within the generalized gradient approximation (GGA) was used to describe the potentials and the electron exchange-correlation energy.<sup>5,6</sup> The D3 dispersion correction was applied to describe the van der Waals interactions. The plane wave cutoff energy was set to 400 eV, and electron smearing via a 2<sup>nd</sup>-order Methfessel-Paxton<sup>7</sup> technique with the width of 0.2 eV was employed to ensure the energy errors less than 1 meV/atom. The

adsorption energy ( $E_{\text{ads}}$ ) of the surface species is calculated by  $E_{\text{ads}} = E_{\text{species} + \text{surface}} - E_{\text{species}} - E_{\text{surface}}$ , where  $E_{\text{species} + \text{surface}}$  is the total energy of the adsorbed species with catalyst,  $E_{\text{surface}}$  and  $E_{\text{species}}$  represent the energy of the unoccupied surface and species in the gas phase, respectively.

### **Models**

The  $\text{MoO}_3$  unit cell was modeled as an orthorhombic structure with Pbnm symmetry, supported by TEM and XRD results. The  $\text{MoO}_3(010)$  facet was built to simulate the material surface because it has the lowest surface energy and exposes the Mo=O terminal and Mo-O-Mo bridge oxygen sites<sup>[8]</sup>. The p (3 × 3) supercells which contain 54 O atoms and 18 Mo atoms were used for the surface model. The top two layers along with adsorbates were allowed to relax and the bottom two layers were fixed in their bulk positions. To avoid significant slab interaction the vacuum gap space between slabs was set to 15 Å, excluding the adsorbates. According to the lattice sizes,  $2 \times 2 \times 1$  k-point grid sampling within the Brillouin zones was set.

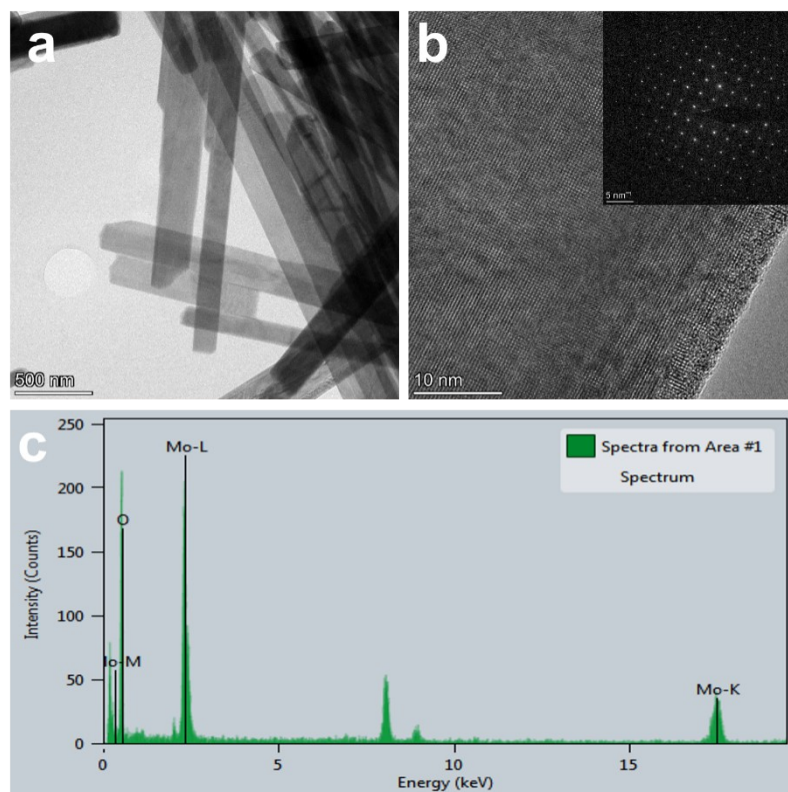

**Fig. S1.** (a) TEM, (b) HRTEM images (Inset is selected area electron diffraction pattern) and (c) EDS energy spectrum of MoO<sub>3</sub> nanorods. The length and width of MoO<sub>3</sub> nanorods are approximately 7  $\mu\text{m}$  and 200 nm, respectively.

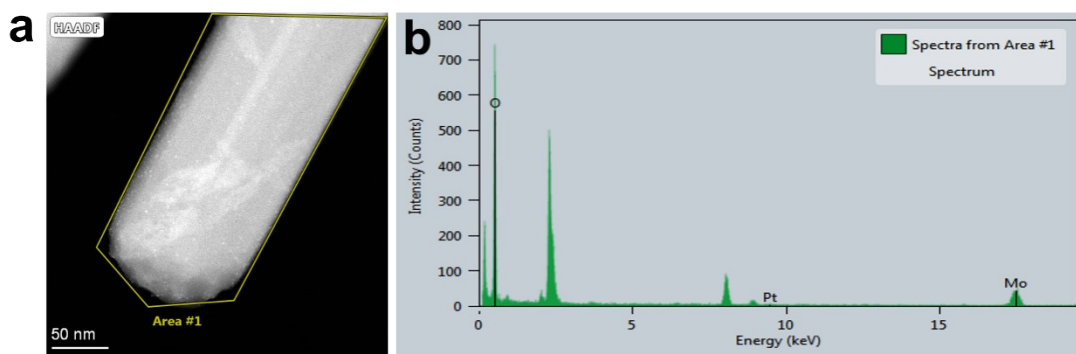

**Fig. S2.** (a) HAADF-STEM image and (b) EDS energy spectrum of  $\text{Pt}_n/\text{MoO}_3$  catalysts.

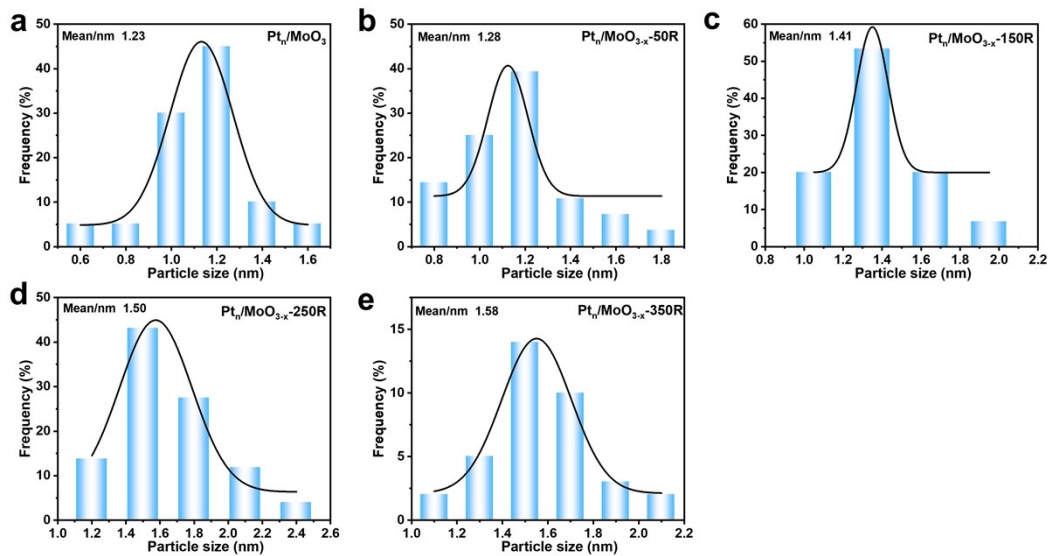

**Fig. S3** (a-e) The particle size distribution statistics of the catalysts.

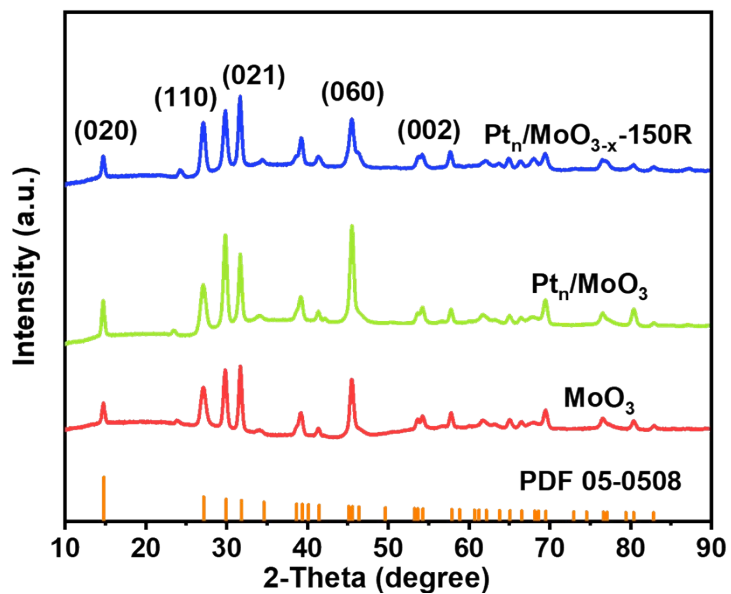

**Fig. S4.** XRD patterns of  $\text{MoO}_3$ ,  $\text{Pt}_n/\text{MoO}_3$  and  $\text{Pt}_n/\text{MoO}_{3-x}-150\text{R}$  catalysts.

The peaks observed at  $14.8^\circ$ ,  $27.2^\circ$ ,  $31.9^\circ$ ,  $45.6^\circ$ , and  $57.9^\circ$  can be assigned to the (020), (110), (021), (060) and (002) crystallographic planes of orthorhombic  $\text{MoO}_3$ , respectively. Notably, no diffraction peaks corresponding to Pt species were detected due to the low loading and the high dispersion of Pt clusters.

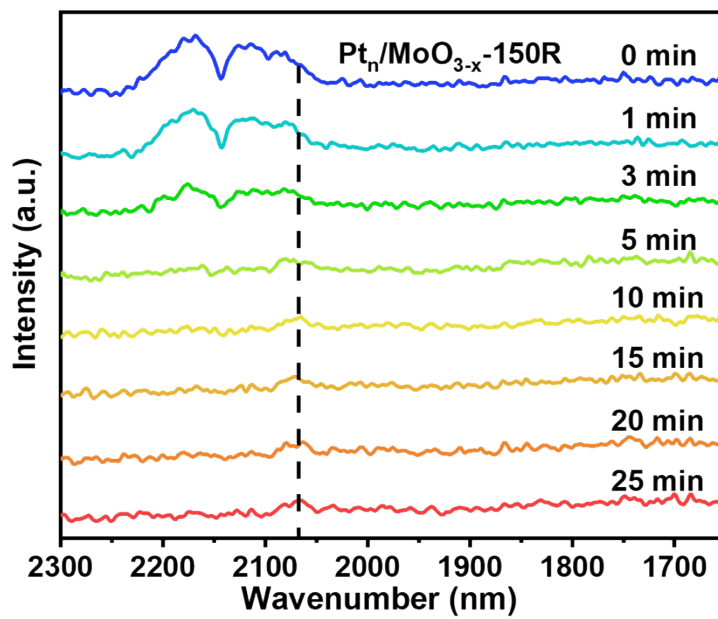

Fig. S5. In situ CO-DRIFT spectra of Pt<sub>n</sub>/MoO<sub>3-x</sub>-150R catalysts.

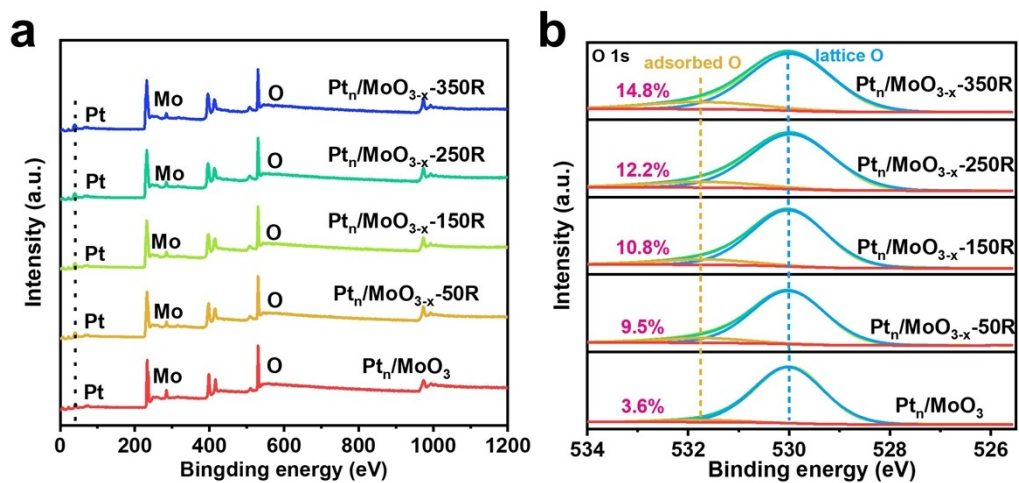

Fig. S6. (a) Full spectra and (b) O1s XPS spectra of Pt<sub>n</sub>/MoO<sub>3</sub> and Pt<sub>n</sub>/MoO<sub>3-x</sub>-yR catalysts.

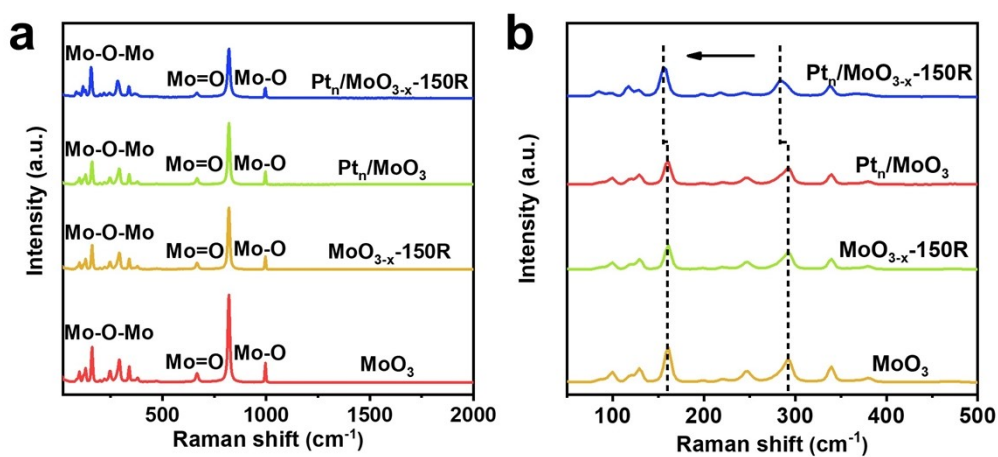

**Fig. S7.** (a) Raman spectra and (b) corresponding amplified spectra of the  $\text{MoO}_3$ ,  $\text{MoO}_{3-x}\text{-150R}$ ,  $\text{Pt}_n/\text{MoO}_3$  and  $\text{Pt}_n/\text{MoO}_{3-x}\text{-150R}$  catalysts.

The Raman peaks at  $994$  and  $818\text{ cm}^{-1}$  are attributed to the stretching vibrations of Mo-O bonds in  $\text{MoO}_3$ . The peak at  $160\text{ cm}^{-1}$  corresponds to the bending mode of Mo-O-Mo, while the peak at  $665\text{ cm}^{-1}$  originates from the stretching vibration of terminal Mo=O bond.

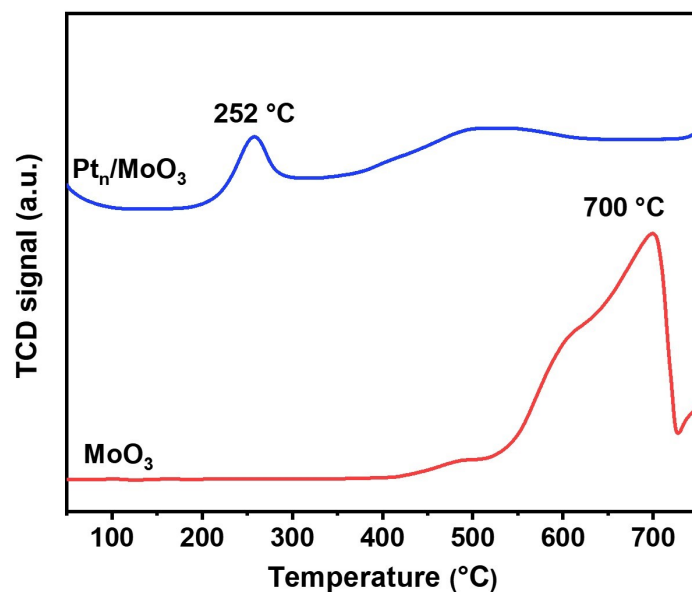

**Fig. S8.** H<sub>2</sub>-TPR profiles of the MoO<sub>3</sub> and Pt<sub>n</sub>/MoO<sub>3</sub> catalysts.

The reduction of bare MoO<sub>3</sub> needs a much higher temperature (around 700 °C). Remarkably, the reduction temperature of Pt<sub>n</sub>/MoO<sub>3</sub> significantly decreases to 252 °C, demonstrating that Pt clusters can facilitate hydrogen dissociation and subsequent spillover to MoO<sub>3</sub>. This observed redshift further indicates a structural transformation of MoO<sub>3</sub> from long-range ordered to short-range disordered configuration, which is typically accompanied by the formation of oxygen vacancies (Ov).

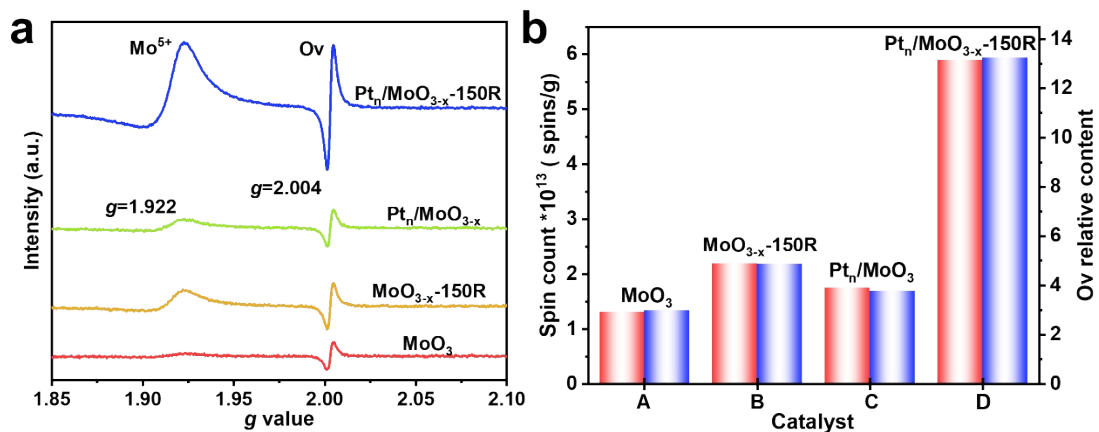

**Fig. S9.** (a) EPR spectra of  $\text{MoO}_3$ ,  $\text{MoO}_{3-x}\text{-150R}$ ,  $\text{Pt}_n/\text{MoO}_3$  and  $\text{Pt}_n/\text{MoO}_{3-x}\text{-150R}$  catalysts. (b) Ov concentration and electron spin number of  $\text{MoO}_3$ ,  $\text{MoO}_{3-x}\text{-150R}$ ,  $\text{Pt}_n/\text{MoO}_3$  and  $\text{Pt}_n/\text{MoO}_{3-x}\text{-150R}$  catalysts (with 1,1-Diphenyl-2-picrylhydrazyl as standard substance).

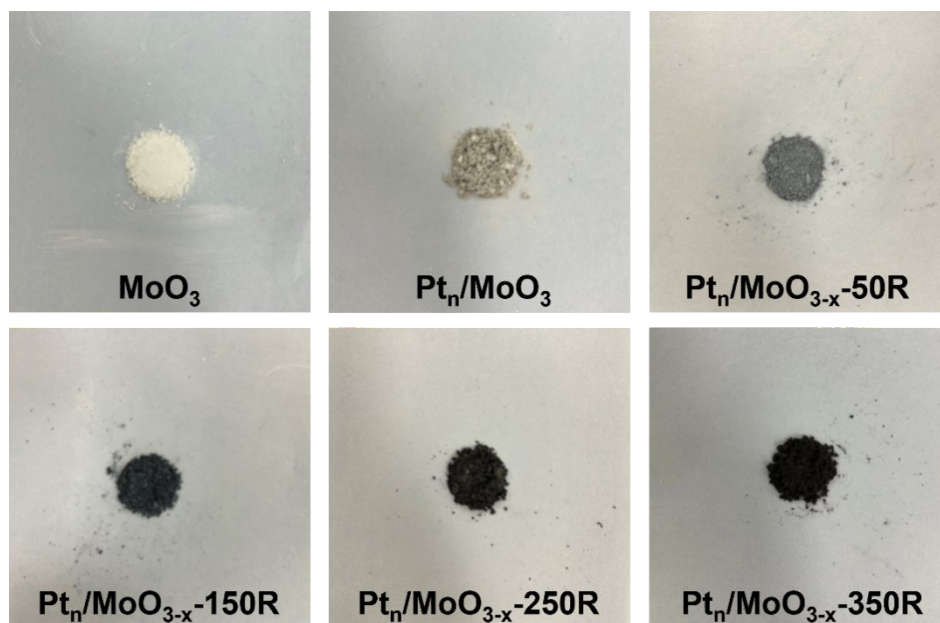

**Fig. S10.** Color changes of  $\text{MoO}_3$ ,  $\text{Pt}_n/\text{MoO}_3$  and  $\text{Pt}_n/\text{MoO}_{3-x}\text{-yR}$  catalysts.

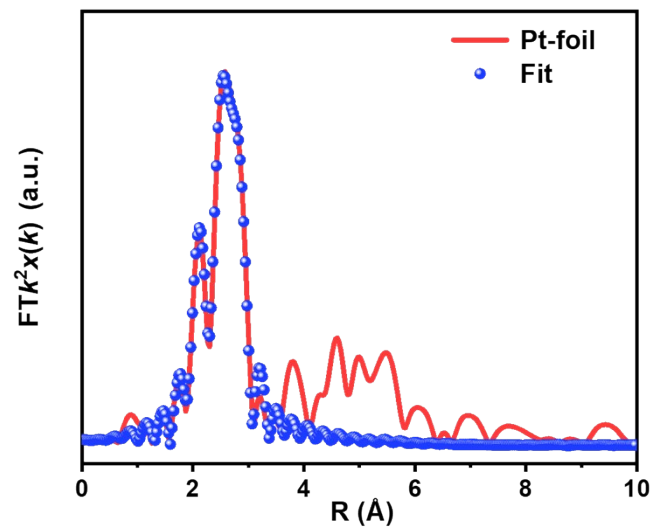

**Fig. S11.** EXAFS R-space fitting curves (blue ball) for the Pt foil.

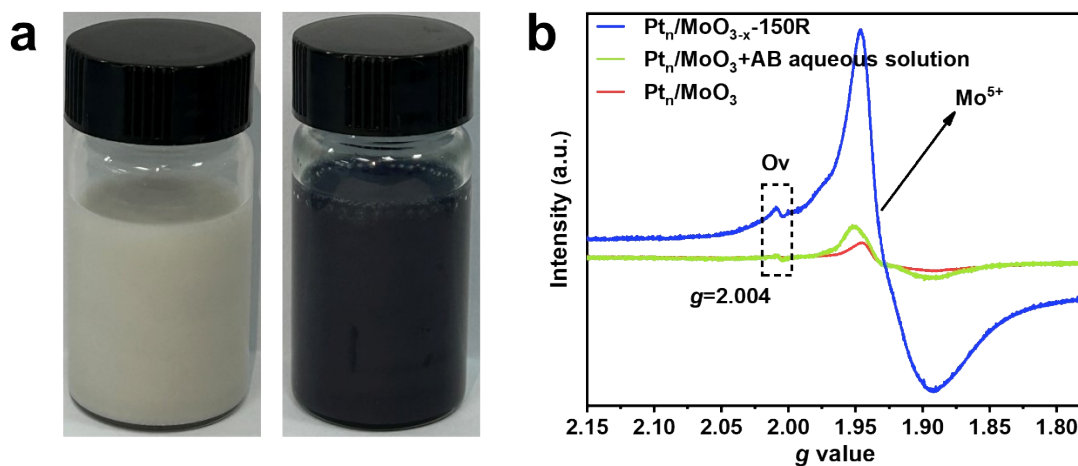

**Fig. S12.** (a) Color change during in-situ reaction. (b) EPR spectra of Pt<sub>n</sub>/MoO<sub>3</sub> catalyst under reducing conditions and in situ catalytic conditions for hydrogen production from AB.

The obvious color transition was observed during the reaction due to the generation of Ov by in situ generated active hydrogen species (Fig. S12a). However, their contribution is much weaker than the hydrogen spillover effect during the gaseous hydrotreatment process, which can lead to the generation of more Ov (Fig. S12b). Therefore, the synergy between Pt cluster and Ov contributes to the boosted H<sub>2</sub> evolution activity.

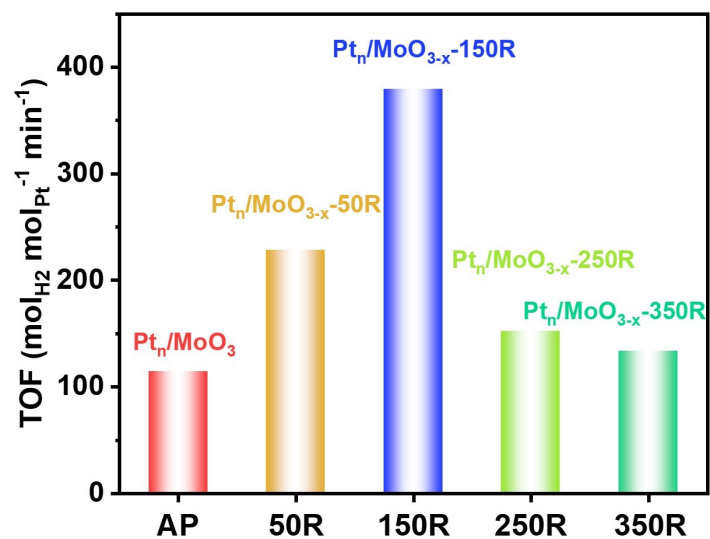

**Fig. S13.** TOF values of Pt<sub>n</sub>/MoO<sub>3</sub> and Pt<sub>n</sub>/MoO<sub>3-x</sub>-yR catalysts in hydrolytic dehydrogenation of AB.

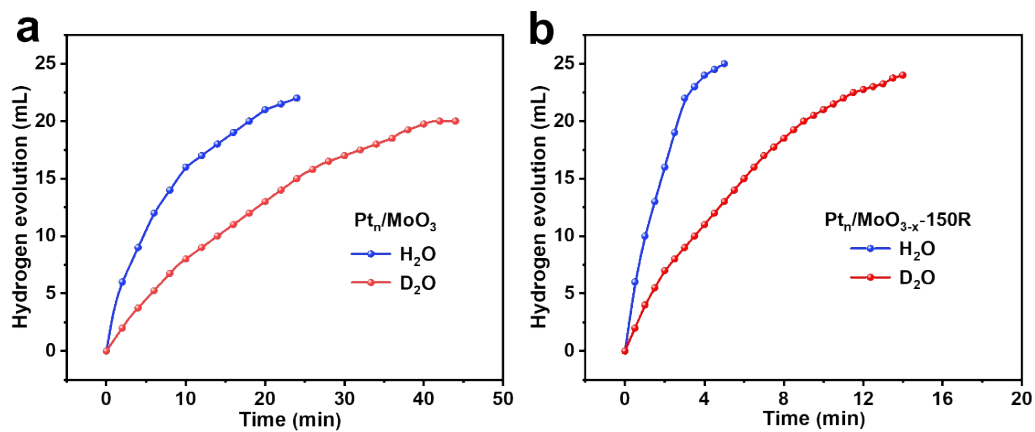

**Fig. S14.** The measurements of KIE values over the (a) Pt<sub>n</sub>/MoO<sub>3</sub> and (b) Pt<sub>n</sub>/MoO<sub>3-x</sub>-150R catalysts.

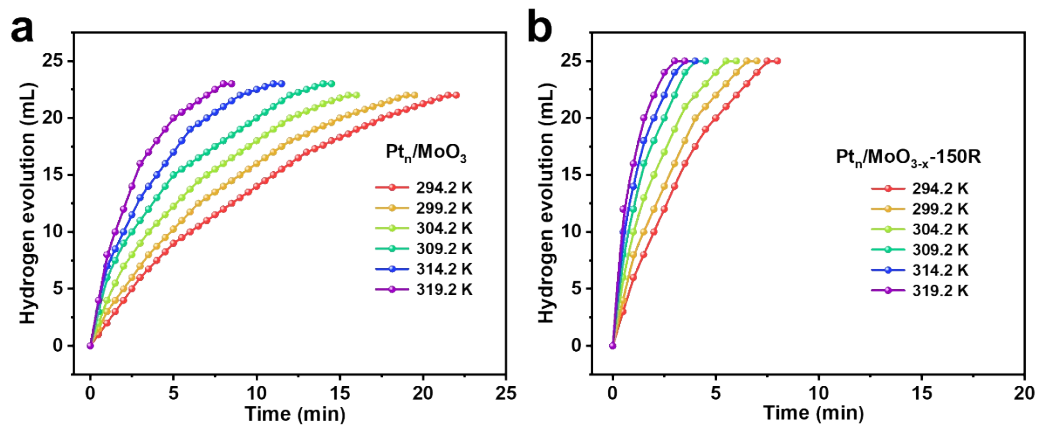

**Fig. S15.** Volume of hydrogen evolved as a function of time under different temperatures catalyzed by the (a)  $Pt_n/MoO_3$  and (b)  $Pt_n/MoO_{3-x}-150R$  catalysts.

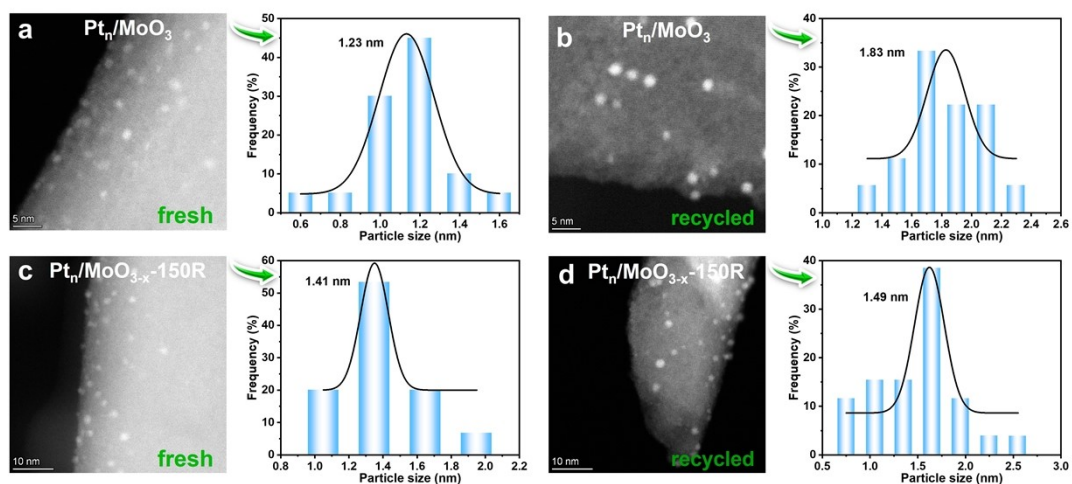

**Fig. S16.** The Morphology changes and corresponding particle size distribution statistics of the Pt<sub>n</sub>/MoO<sub>3</sub> catalyst (a) before and (b) after five catalytic cycles. The Morphology changes and corresponding particle size distribution statistics of the Pt<sub>n</sub>/MoO<sub>3-x</sub>-150R catalyst (c) before and (d) after five catalytic cycles.

From the HAADF-STEM images of the fresh and recycled Pt<sub>n</sub>/MoO<sub>3</sub> (Figs. S16a and 16b), severe detachment and size aggregation of Pt species can be observed. However, for the Pt<sub>n</sub>/MoO<sub>3-x</sub>-150R catalyst (Figs. 16c and 16d), these phenomena are significantly inhibited due to the anchoring effect of Ov toward Pt clusters, consisting well with the above results of excellent cycling stability and much-inhibited Pt leaching over Pt<sub>n</sub>/MoO<sub>3-x</sub>-150R catalysts.

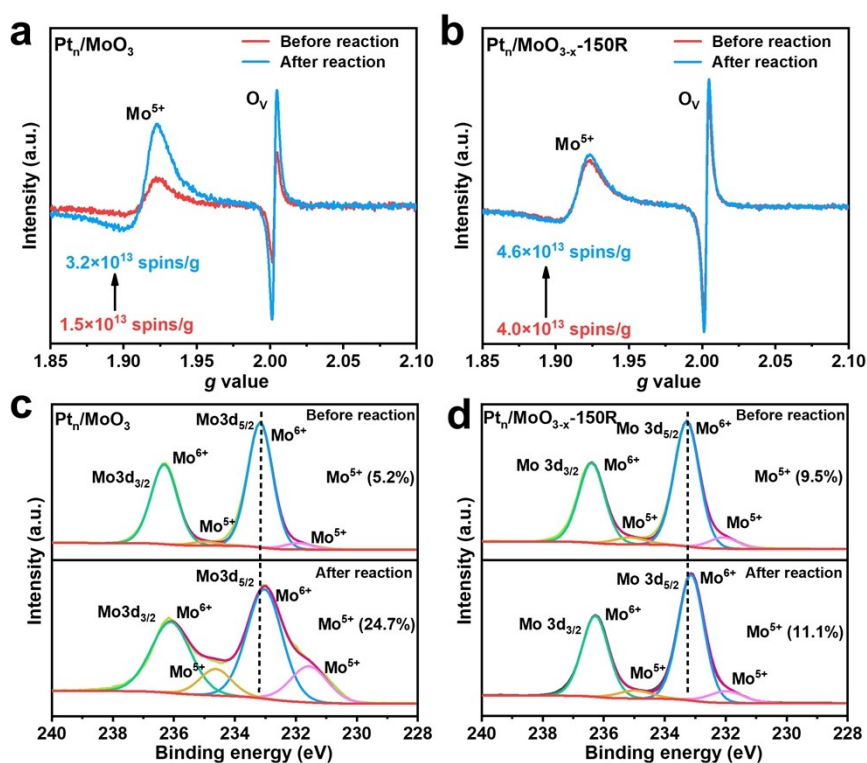

**Fig. S17.** The EPR spectra of (a) Pt<sub>n</sub>/MoO<sub>3</sub> and (b) Pt<sub>n</sub>/MoO<sub>3-x</sub>-150R catalysts before and after five catalytic cycles. The Mo 3d XPS spectra of (c) Pt<sub>n</sub>/MoO<sub>3</sub> and (d) Pt<sub>n</sub>/MoO<sub>3-x</sub>-150R catalysts before and after five catalytic cycles.

EPR analysis before and after the five catalytic cycles revealed that a certain amount of O<sub>V</sub> is newly formed for the Pt<sub>n</sub>/MoO<sub>3</sub> catalyst (Fig. S17a). However, the O<sub>V</sub> concentration in the activated Pt<sub>n</sub>/MoO<sub>3-x</sub>-150R catalysts are almost unchanged before and after five catalytic cycles (Fig. S17b). Besides, the XPS analysis further corroborated these findings: the proportion of Mo<sup>5+</sup> in the Pt<sub>n</sub>/MoO<sub>3</sub> catalyst increased notably after five catalytic cycles (Fig. S17c), whereas the proportion changes of Mo<sup>5+</sup> in the Pt<sub>n</sub>/MoO<sub>3-x</sub>-150R catalyst are almost negligible (Fig. S17d). Therefore, activation treatment toward Pt<sub>n</sub>/MoO<sub>3</sub> is an indispensable step to modulate O<sub>V</sub> concentration and boost catalytic activity and stability.

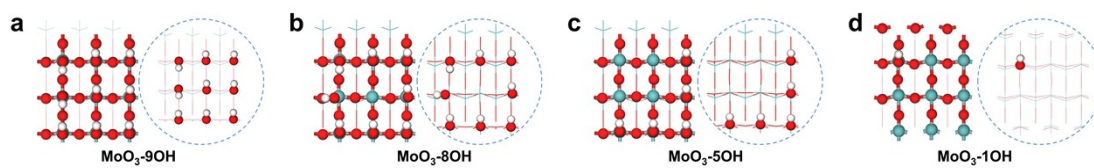

**Fig. S18.** The surface structures of (a)  $\text{MoO}_3\text{-9OH}$ , (b)  $\text{MoO}_3\text{-8OH}$ , (c)  $\text{MoO}_3\text{-5OH}$  and (d)  $\text{MoO}_3\text{-1OH}$ . Color code: H (white), O (red), Mo (cyan).

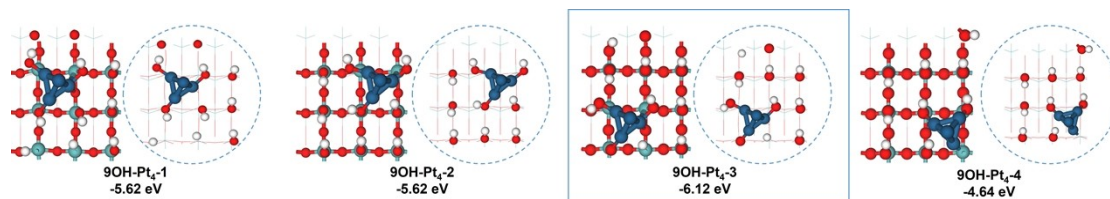

**Fig. S19.** The structures and adsorption energies of Pt<sub>4</sub> cluster decorated on the MoO<sub>3</sub>-9OH. The optimal configuration is highlighted with the rectangle. Color code: H (white), O (red), Mo (cyan), Pt (dark blue).

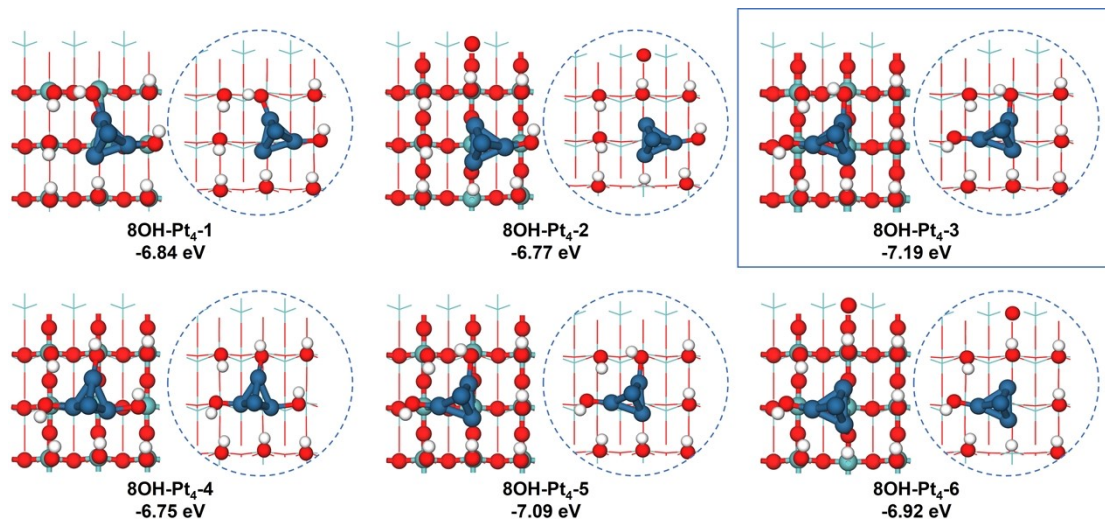

**Fig. S20.** The structures and adsorption energies of Pt<sub>4</sub> cluster decorated on the MoO<sub>3</sub>-8OH. The optimal configuration is highlighted with the rectangle.

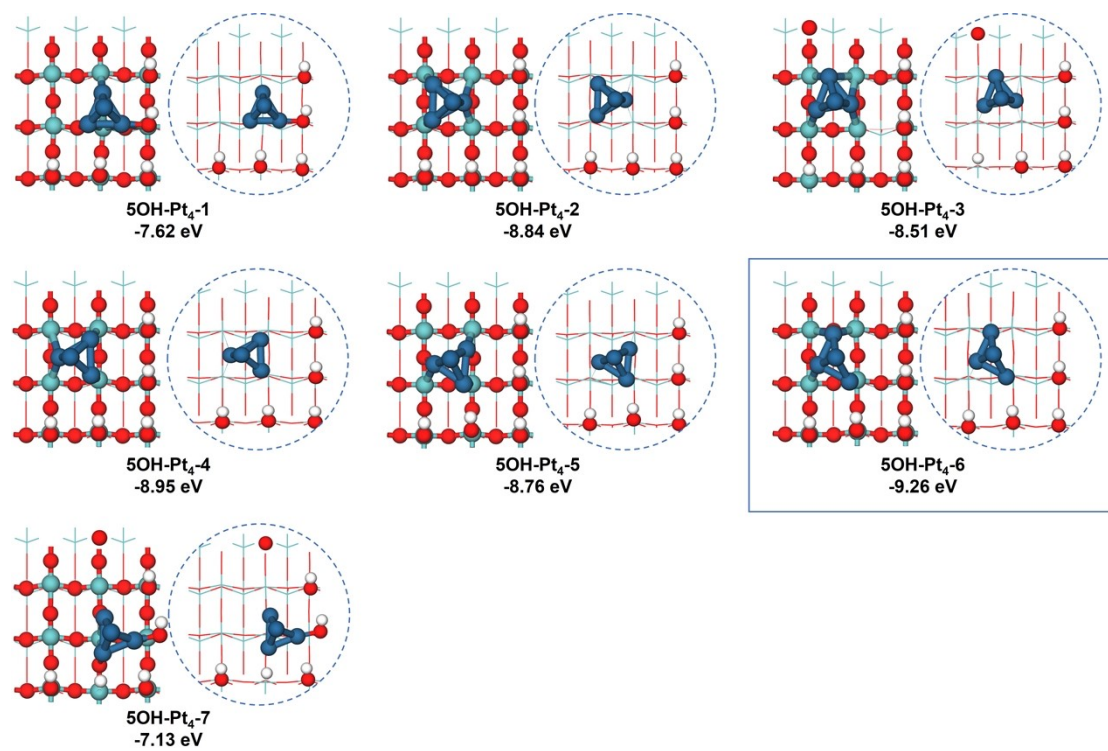

**Fig. S21.** The structures and adsorption energies of Pt<sub>4</sub> cluster decorated on the MoO<sub>3</sub>-5OH.

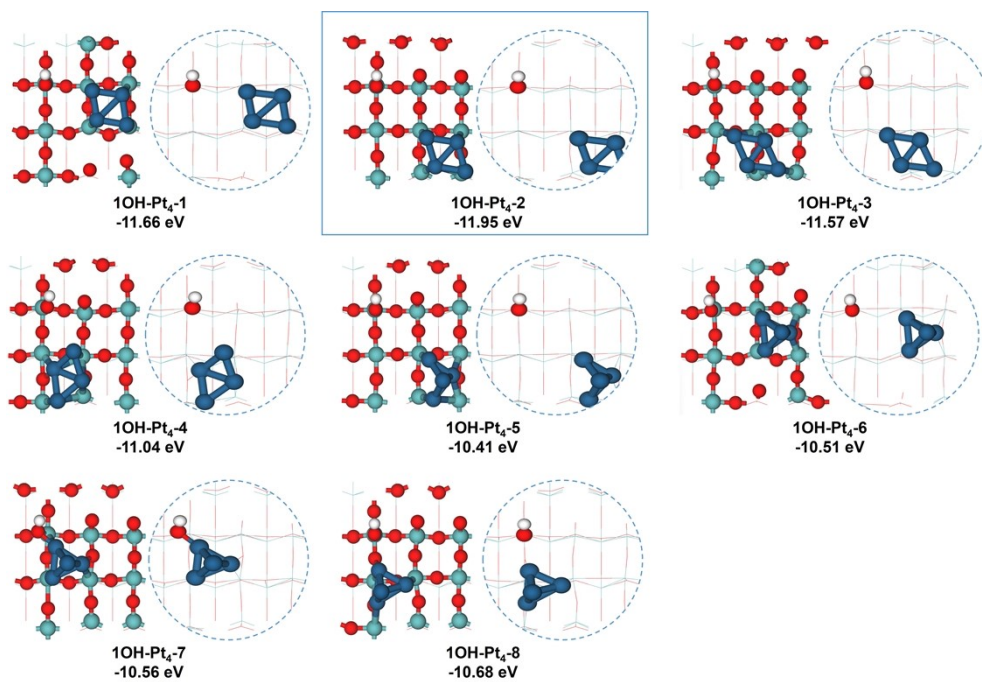

**Fig. S22.** The structures and adsorption energies of Pt<sub>4</sub> cluster decorated on the MoO<sub>3</sub>-1OH.

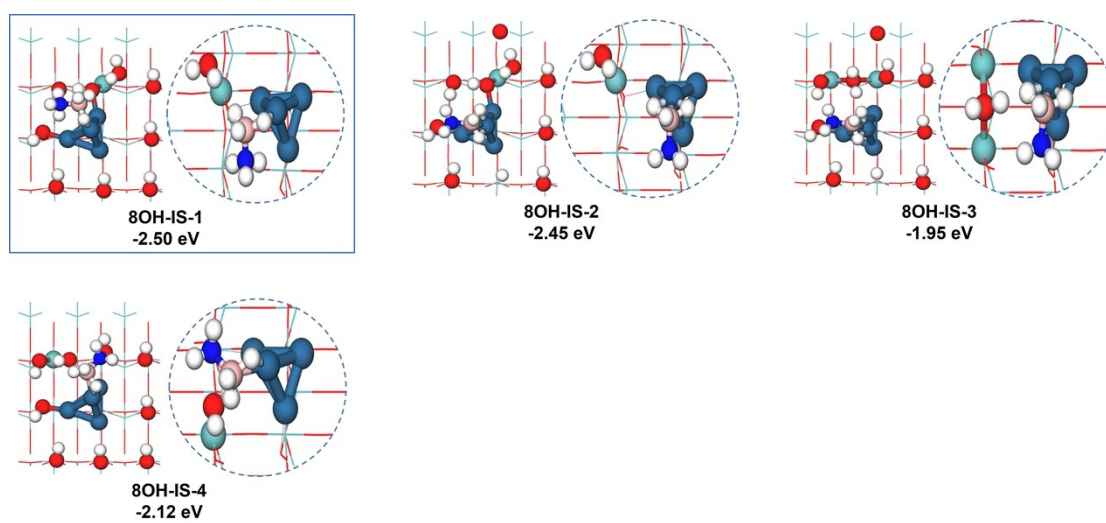

**Fig. S23.** The structures and adsorption energies of the initial states (co-adsorption) on the  $\text{Pt}_n/\text{MoO}_3\text{-8OH}$  surface. The H, O, Mo, Pt, N, B atoms are denoted white, red, cyan, dark blue, blue and pink balls, respectively.

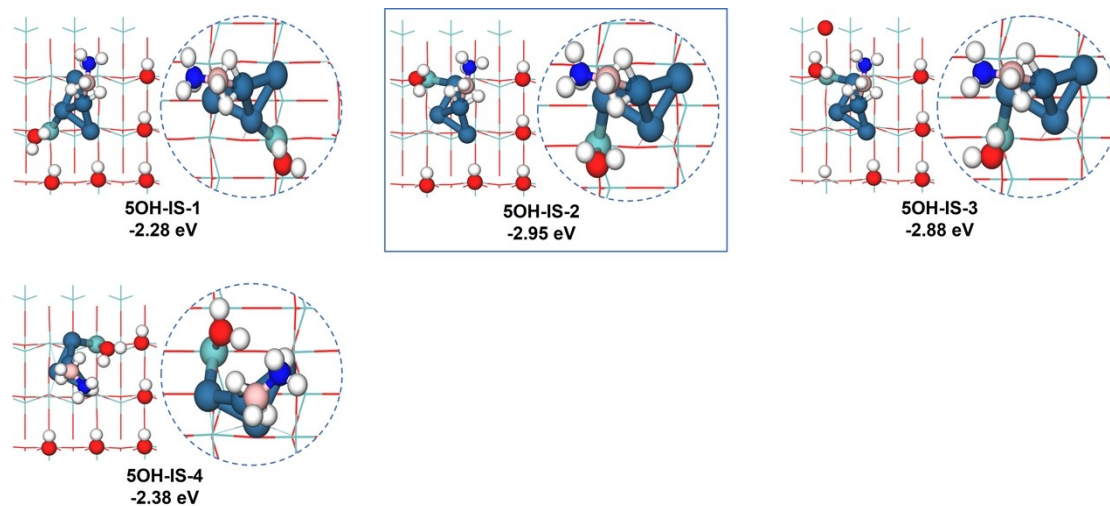

**Fig. S24.** The structures and adsorption energies of the initial states (co-adsorption) on the  $\text{Pt}_7/\text{MoO}_3\text{-5OH}$  surface.

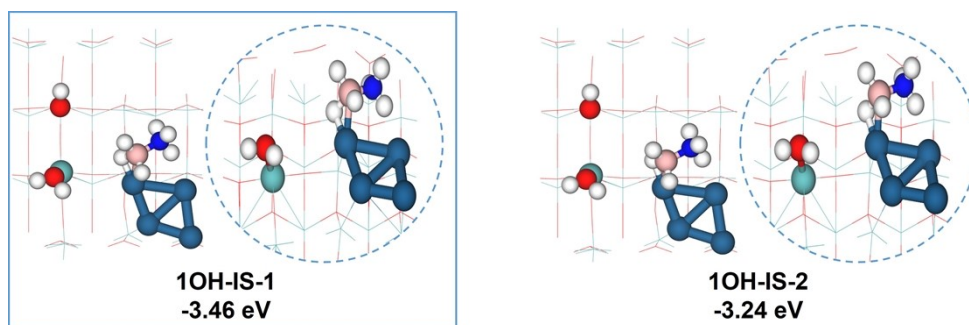

**Fig. S25.** The structures and adsorption energies of the initial states (co-adsorption) on the Pt<sub>n</sub>/MoO<sub>3</sub>-1OH surface.

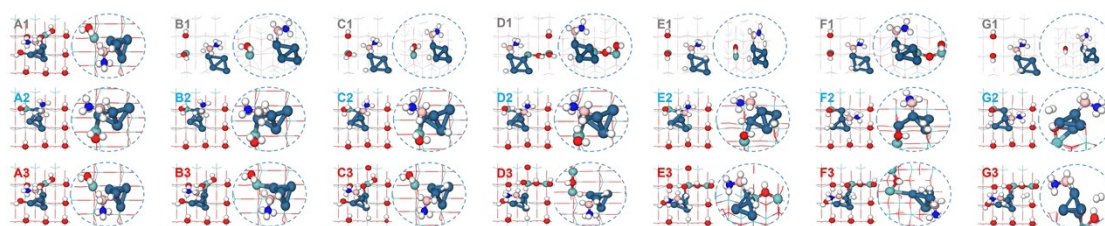

**Fig. S26.** The structures for  $\text{NH}_3\text{BH}_3$  and  $\text{H}_2\text{O}$  dehydrogenation on the  $\text{Pt}_n/\text{MoO}_3$ -1OH  $\text{Pt}_n/\text{MoO}_3$ -5OH and  $\text{Pt}_n/\text{MoO}_3$ -8OH catalyst models.

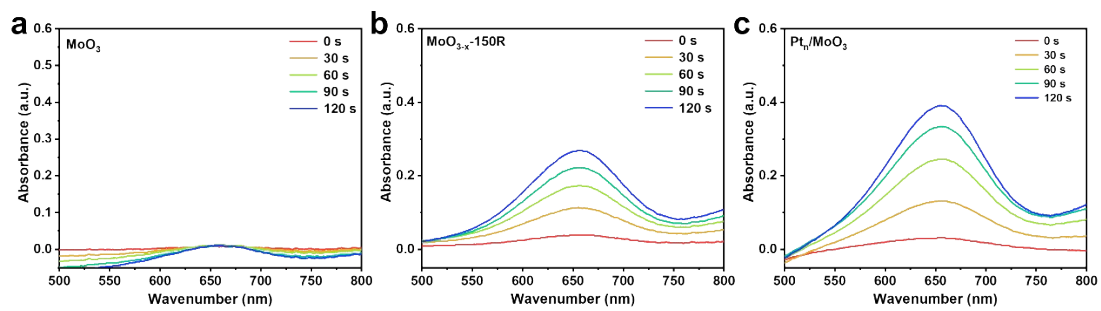

**Fig. S27.** The UV-vis absorption spectra of H<sub>2</sub>O<sub>2</sub>-TMB system catalyzed by (a) MoO<sub>3</sub>, (b) MoO<sub>3-x</sub>-150R and (c) Pt<sub>n</sub>/MoO<sub>3</sub> catalysts.

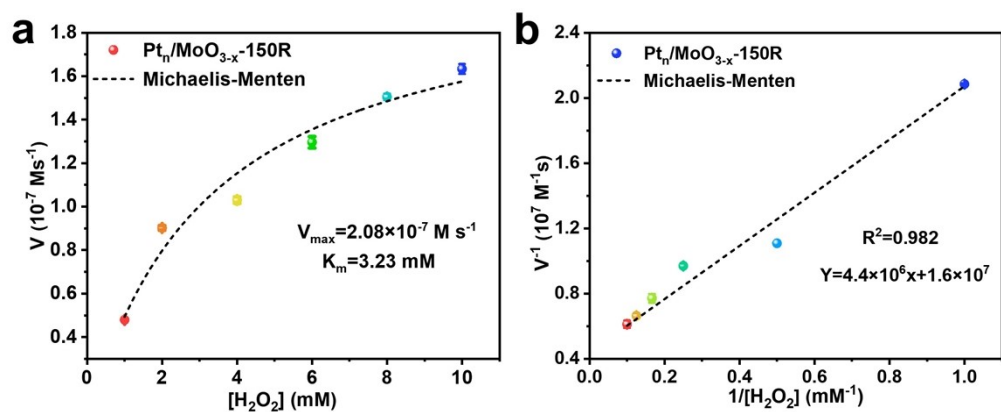

**Fig. S28.** (a) The Michaeli-Menten kinetics at various H<sub>2</sub>O<sub>2</sub> concentrations catalyzed by Pt<sub>n</sub>/MoO<sub>3-x</sub>-150R catalysts. (b) The Lineweaver Burk plot of 1/V vs 1/[H<sub>2</sub>O<sub>2</sub>] over the Pt<sub>n</sub>/MoO<sub>3-x</sub>-150R catalysts.

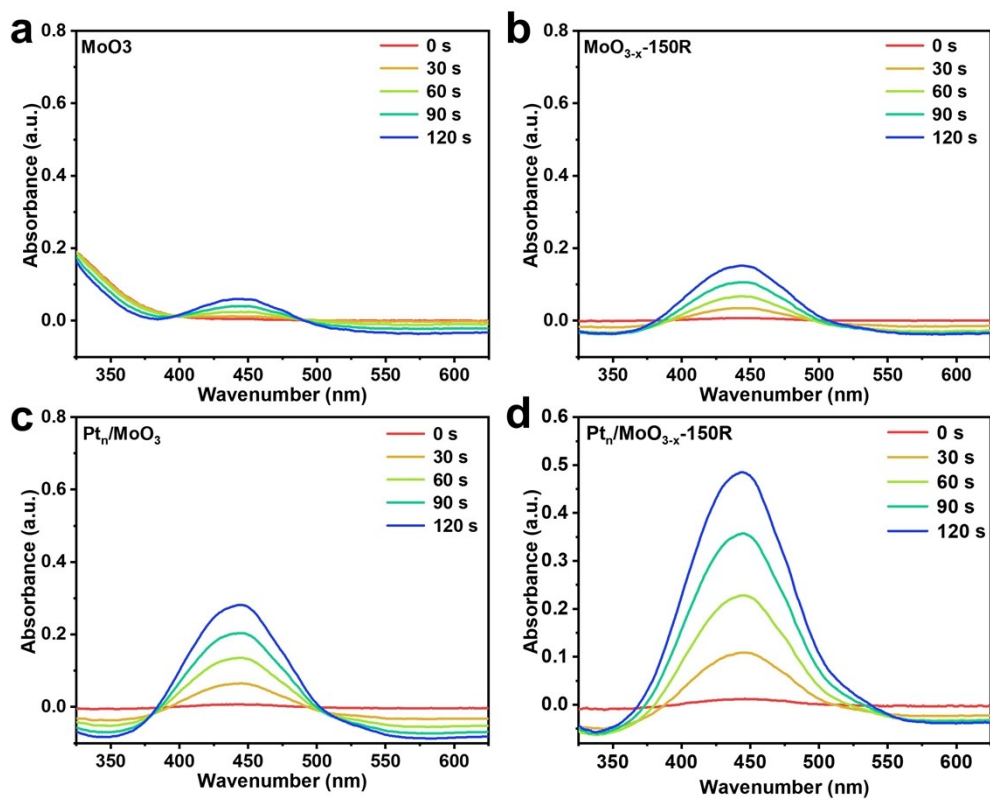

**Fig. S29.** The UV-vis absorption spectra of  $H_2O_2$ -OPD catalyzed by (a)  $MoO_3$ , (b)  $MoO_{3-x}$ -150R, (c)  $Pt_{II}/MoO_3$  and (d)  $Pt_{II}/MoO_{3-x}$ -150R catalysts.

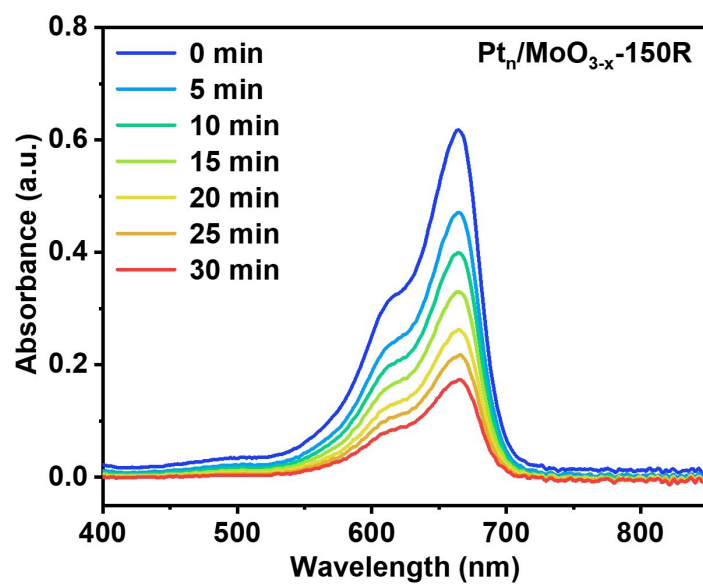

**Fig. S30.** Time dependent MB degradation activity catalyzed by Pt<sub>n</sub>/MoO<sub>3-x</sub>-150R catalysts.

**Table S1.** Pt loadings of different catalysts determined by ICP-OES.

| <b>Catalysts</b>                          | <b>Pt loadings (wt%)</b> |
|-------------------------------------------|--------------------------|
| Pt <sub>n</sub> /MoO <sub>3</sub>         | 0.42                     |
| Pt <sub>n</sub> /MoO <sub>3-x</sub> -50R  | 0.45                     |
| Pt <sub>n</sub> /MoO <sub>3-x</sub> -150R | 0.44                     |
| Pt <sub>n</sub> /MoO <sub>3-x</sub> -250R | 0.43                     |
| Pt <sub>n</sub> /MoO <sub>3-x</sub> -350R | 0.44                     |

**Table S2.** Activity comparison of the Pt-based catalysts tested in the hydrolytic reaction of AB ever reported.

| Catalysts                                       | Temperatures    | $n_{\text{Pt}}/n_{\text{AB}}$ | TOF <sup>a</sup>    | References |
|-------------------------------------------------|-----------------|-------------------------------|---------------------|------------|
| Pt/ $\gamma$ -Al <sub>2</sub> O <sub>3</sub>    | 25 °C           | 0.018                         | 222                 | 8          |
| Pt/CeO <sub>2</sub>                             | 25 °C           | 0.018                         | 182                 | 9          |
| Pt@MIL-101                                      | 25 °C           | 0.0029                        | 414                 | 10         |
| Pt/CNTs-O-HT                                    | 25 °C           | 0.0047                        | 468                 | 11         |
| Pt <sub>25</sub> @TiO <sub>2</sub>              | 25 °C           | 0.0016                        | 311                 | 12         |
| Ptn/MoO <sub>3-x</sub> -150R                    | 25 °C           | 0.0028                        | 379                 | This work  |
| Ni <sub>0.33</sub> @Pt <sub>0.67</sub> /C       | 25 °C           | 0.018                         | 81                  | 13         |
| Pt@Co/mCN                                       | 35 °C           | 0.004                         | 118                 | 14         |
| NiPt(1:3)                                       | RT <sup>b</sup> | 0.05                          | 84.1                | 15         |
| Pt <sub>1</sub> /Co <sub>3</sub> O <sub>4</sub> | 25 °C           | 0.0008                        | 1220                | 16         |
| KB-CuPt                                         | 25 °C           | 0.002                         | 859                 | 17         |
| Ni <sub>2</sub> Pt@ZIF-8                        | RT              | 0.01                          | 2222.2 <sup>c</sup> | 18         |
| Pt <sub>0.5</sub> Ru <sub>0.5</sub> /CNT        | 25 °C           | --                            | 546                 | 19         |
| PtCo/SAPO-34                                    | 30 °C           | 0.0079                        | 262                 | 20         |

<sup>a</sup> The TOF unit is mol<sub>H<sub>2</sub></sub> mol<sub>Pt</sub><sup>-1</sup> min<sup>-1</sup>.

<sup>b</sup> RT represents room temperature.

<sup>c</sup> The value is obtained under the addition of 0.3 M of NaOH.

## References

- 1 G. Kresse, J. Furthmüller, *J. Comput. Mater. Sci.*, 1996, **6**, 15-50.
- 2 G. Kresse, J. Furthmüller, *Phys. Rev. B*, 1996, **54**, 11169-11186.
- 3 P. E. Blochl, *Phys. Rev. B*, 1994, **50**, 17953-17979.
- 4 G. Kresse, *Phys. Rev. B*, 1999, **59**, 1758-1775.
- 5 J. P. Perdew, K. M. Burke, Ernzerhof, *Phys. Rev. Lett.*, 1996, **77**, 3865-3868.
- 6 J. P. Perdew, Y. Wang, *Phys. Rev. B*, 1992, **45**, 13244-13249.
- 7 M. Methfessel, A. T. Paxton, *Phys. Rev. B*, 1989, **40**, 3616-3621.
- 8 M. Chandra, Q. Xu, *J. Power Sources*, 2007, **168**, 135-142.
- 9 X. Wang, D. Liu, S. Song, H. Zhang, *Chem. Commun.*, 2012, **48**, 10207-10209.
- 10 A. Aijaz, A. Karkamkar, Y. J. Choi, N. Tsumori, E. Rönnebro, T. Autrey, H. Shioyama, Q. Xu, *J. Am. Chem. Soc.*, 2012, **134**, 13926-13929.
- 11 W. Chen, J. Ji, X. Duan, G. Qian, P. Li, X. Zhou, D. Chen, W. Yuan, *Chem. Commun.*, 2014, **50**, 2142-2144.
- 12 M. Khalily, H. Eren, S. Akbayrak, H. Susapto, N. Biyikli, S. Özkar, M. Guler, *Angew. Chem. Int. Ed.*, 2016, **128**, 12445-12449.
- 13 X. Yang, F. Cheng, J. Liang, Z. Tao, J. Chen, *Int. J. Hydrogen Energy*, 2011, **36**, 1984-1990.
- 14 X. Cui, H. Li, G. Yu, M. Yuan, J. Yang, D. Xu, Y. Hou, Z. Dong, *Int. J. Hydrogen Energy*, 2017, **42**, 27055-27065.
- 15 O. Ramírez, S. Bonardd, C. Saldías, M. Kroff, J. O'Shea, D. Díaz, A. Leiva, *Int. J. Hydrogen Energy*, 2023, **225**, 494-502.
- 16 J. Li, Q. Guan, H. Wu, W. Liu, Y. Lin, Z. Sun, X. Ye, X. Zheng, H. Pan, J. Zhu, S. Chen, W. Zhang, S. Wei, J. Lu, *J. Am. Chem. Soc.*, 2019, **141**, 14515.
- 17 T. Karaca, M. Sevim, Ö. Metin, *ChemCatChem* 2017, **9**, 4185-4190.
- 18 F. Fu, C. Wang, Q. Wang, A. Martinez-Villacorta, A. Escobar, H. Chong, X. Wang, S. Moya, L. Salmon, E. Fouquet, J. Ruiz, D. Astruc, *J. Am. Chem. Soc.*, 2018, **140**, 10034-10042.
- 19 W. Chen, D. Li, C. Peng, G. Qian, X. Duan, D. Chen, X. Zhou, *J. Catal.*, 2017, **356**, 186-196.
- 20 W. Cong, H. Zhang, L. Bing, F. Wang, D. Han, G. Wang, *J. Alloy. Compd.*, 2023, **956**, 170314.
